# Supplementary material for: Cullin 4A (CUL4A), a direct target of miR-9 and miR-137, promotes gastric cancer proliferation and invasion by regulating the Hippo signaling pathway
Source: PubMed Central journal article supplement (PMC4891102; doi:10.18632/oncotarget.7048), 2016-01-28
Supplement: oncotarget-07-10037-s001.pdf [file oncotarget-07-10037-s001.pdf]

## SUPPLEMENTARY TABLES

Supplementary Table S1: The relationship between CUL4A expression and clinicopathological parameters in 124 GC patients (\*P&lt;0.05)

| Groups                | CUL4A protein expression (n = 124) |          |     | p Value |
|-----------------------|------------------------------------|----------|-----|---------|
|                       | positive                           | negative | No. |         |
| Age (years)           |                                    |          |     |         |
| <60                   | 30                                 | 22       | 52  | 0.715   |
| ≥60                   | 38                                 | 34       | 72  |         |
| Gender                |                                    |          |     |         |
| Male                  | 36                                 | 29       | 65  | 1.000   |
| Female                | 32                                 | 27       | 59  |         |
| Lauran                |                                    |          |     |         |
| Intestinal            | 45                                 | 32       | 77  | 0.354   |
| Nonintestinal         | 23                                 | 24       | 47  |         |
| Differentiation       |                                    |          |     |         |
| Low                   | 28                                 | 20       | 48  | 0.582   |
| Moderate or well      | 40                                 | 36       | 76  |         |
| Tumor size<cm>        |                                    |          |     |         |
| ≤ 4                   | 20                                 | 21       | 41  | 0.443   |
| >4                    | 48                                 | 35       | 83  |         |
| pT stage              |                                    |          |     |         |
| pT1+pT2               | 16                                 | 24       | 40  | 0.033*  |
| pT3+pT4               | 52                                 | 32       | 84  |         |
| Lymph node metastasis |                                    |          |     |         |
| N0+N1                 | 17                                 | 29       | 46  | 0.003*  |
| N2+N3                 | 51                                 | 27       | 78  |         |
| UICC stage            |                                    |          |     |         |
| I/II                  | 18                                 | 26       | 44  | 0.025*  |
| III/IV                | 50                                 | 30       | 80  |         |
| Total                 | 68                                 | 56       | 124 |         |

**Supplementary Table S2: Clinicopathological characteristics of the 18 gastric cancer patients**

| Patient no. | Age(years) | Sex | TNM classification                           | Clinical stage | Tumour size(cm <sup>3</sup> ) | Histological type (differentiated) |
|-------------|------------|-----|----------------------------------------------|----------------|-------------------------------|------------------------------------|
| 1           | 53         | F   | T <sub>2</sub> N <sub>0</sub> M <sub>0</sub> | I              | 2 × 1 × 1                     | Moderate                           |
| 2           | 42         | F   | T <sub>3</sub> N <sub>2</sub> M <sub>0</sub> | III            | 6 × 4 × 3                     | Well                               |
| 3           | 68         | M   | T <sub>3</sub> N <sub>0</sub> M <sub>0</sub> | II             | 3 × 3 × 1                     | Poor                               |
| 4           | 44         | M   | T <sub>4</sub> N <sub>2</sub> M <sub>0</sub> | III            | 6 × 5 × 8                     | Moderate                           |
| 5           | 51         | F   | T <sub>3</sub> N <sub>2</sub> M <sub>0</sub> | III            | 4 × 6 × 5                     | Well                               |
| 6           | 47         | M   | T <sub>3</sub> N <sub>0</sub> M <sub>0</sub> | II             | 1 × 3 × 2                     | Well                               |
| 7           | 56         | F   | T <sub>4</sub> N <sub>3</sub> M <sub>0</sub> | III            | 8 × 4 × 3                     | Poor                               |
| 8           | 60         | M   | T <sub>2</sub> N <sub>0</sub> M <sub>0</sub> | I              | 2 × 1 × 1                     | Moderate                           |
| 9           | 56         | F   | T <sub>3</sub> N <sub>0</sub> M <sub>0</sub> | II             | 2 × 3 × 0.5                   | Well                               |
| 10          | 49         | M   | T <sub>2</sub> N <sub>3</sub> M <sub>0</sub> | III            | 5 × 5 × 3                     | Poor                               |
| 11          | 60         | F   | T <sub>3</sub> N <sub>2</sub> M <sub>0</sub> | III            | 4.5 × 2 × 3                   | Moderate                           |
| 12          | 55         | M   | T <sub>3</sub> N <sub>3</sub> M <sub>0</sub> | III            | 8 × 4 × 6                     | Poor                               |
| 13          | 49         | F   | T <sub>1</sub> N <sub>2</sub> M <sub>0</sub> | II             | 1 × 2 × 1.5                   | Moderate                           |
| 14          | 57         | F   | T <sub>3</sub> N <sub>0</sub> M <sub>0</sub> | II             | 4 × 1 × 4.5                   | Moderate                           |
| 15          | 62         | M   | T <sub>3</sub> N <sub>2</sub> M <sub>0</sub> | III            | 6 × 5 × 2                     | Poor                               |
| 16          | 58         | F   | T <sub>3</sub> N <sub>0</sub> M <sub>0</sub> | II             | 3.5 × 3 × 1.5                 | Well                               |
| 17          | 49         | F   | T <sub>4</sub> N <sub>2</sub> M <sub>0</sub> | III            | 2 × 3 × 4                     | Moderate                           |
| 18          | 44         | M   | T <sub>2</sub> N <sub>1</sub> M <sub>0</sub> | II             | 2 × 3 × 2                     | Poor                               |

M, male; F, female.

**Supplementary Table S3: Primers**

|         |                          |                         |
|---------|--------------------------|-------------------------|
| MST1    | F: GTGATGAGATGGGCACTGTC  | R: TCCTCTGCATTGATCACCAT |
| MST2    | F: CTGGTCCCTTGGCATTACTT  | R: GGACCAAAGTTCTGGCTTTC |
| LATS1   | F: GGCTTCAGATGGACACACGA  | R: GCTCTCCGCTCTAATGGCTT |
| YAP     | F: GCATGATCTGCCCTAAGGC   | R: TGACCGCCGAGTACACCAT  |
| c-Myc   | F: CCCTCCACTCGGAAGGACTA  | R: GCGGTGCATTTTCGGTTGT  |
| CTGF    | F: CAAGGGCCTCTTCTGTGACTT | R: GGTACACCGTACCACCGAAG |
| CYR61   | F: CGCCTTGTGAAAGAAACCCG  | R: GGTTCGGGGGATTTCTTGGT |
| CDX2    | F: GAGTGGTGTACACGGACCAC  | R: CTCCTTTGCTCTGCGGTTCT |
| AREG    | F: TGTCGCTCTTGATACTCGGC  | R: ATGGTTCACGCTTCCCAGAG |
| CUL4A   | F: GCAACAAAGAAGCCACAGACG | R: CGACTGAGGCACTTTTCCCA |
| miR-9   | F: GGGTCTTTGGTTATCTAGC   | R: TGCGTGTCTGGAGTC      |
| miR-137 | F: GCGUUAUUGCUUAAGAAUAC  | R: CAGTGCAGGGTCCGAGGT   |
| U6      | F: AGAGCCTGTGGTGTCCG     | R: CATCTTCAAAGCACTTCCCT |
| GAPDH   | F: GGCATCCTGGGCTACTACTGA | R: GAGTGGGTGTCGCTGTTGAA |
